# Supplementary material for: Conjugative IncHI2/HI2A plasmids harbouring mcr-9 in colistin-susceptible Escherichia coli isolated from diseased pigs in Japan
Source: PubMed Central journal article supplement (PMC9833416; doi:10.1099/acmi.0.000454), 2022-11-28
Supplement: acmi-4-454-s001.pdf [file acmi-4-454-s001.pdf]

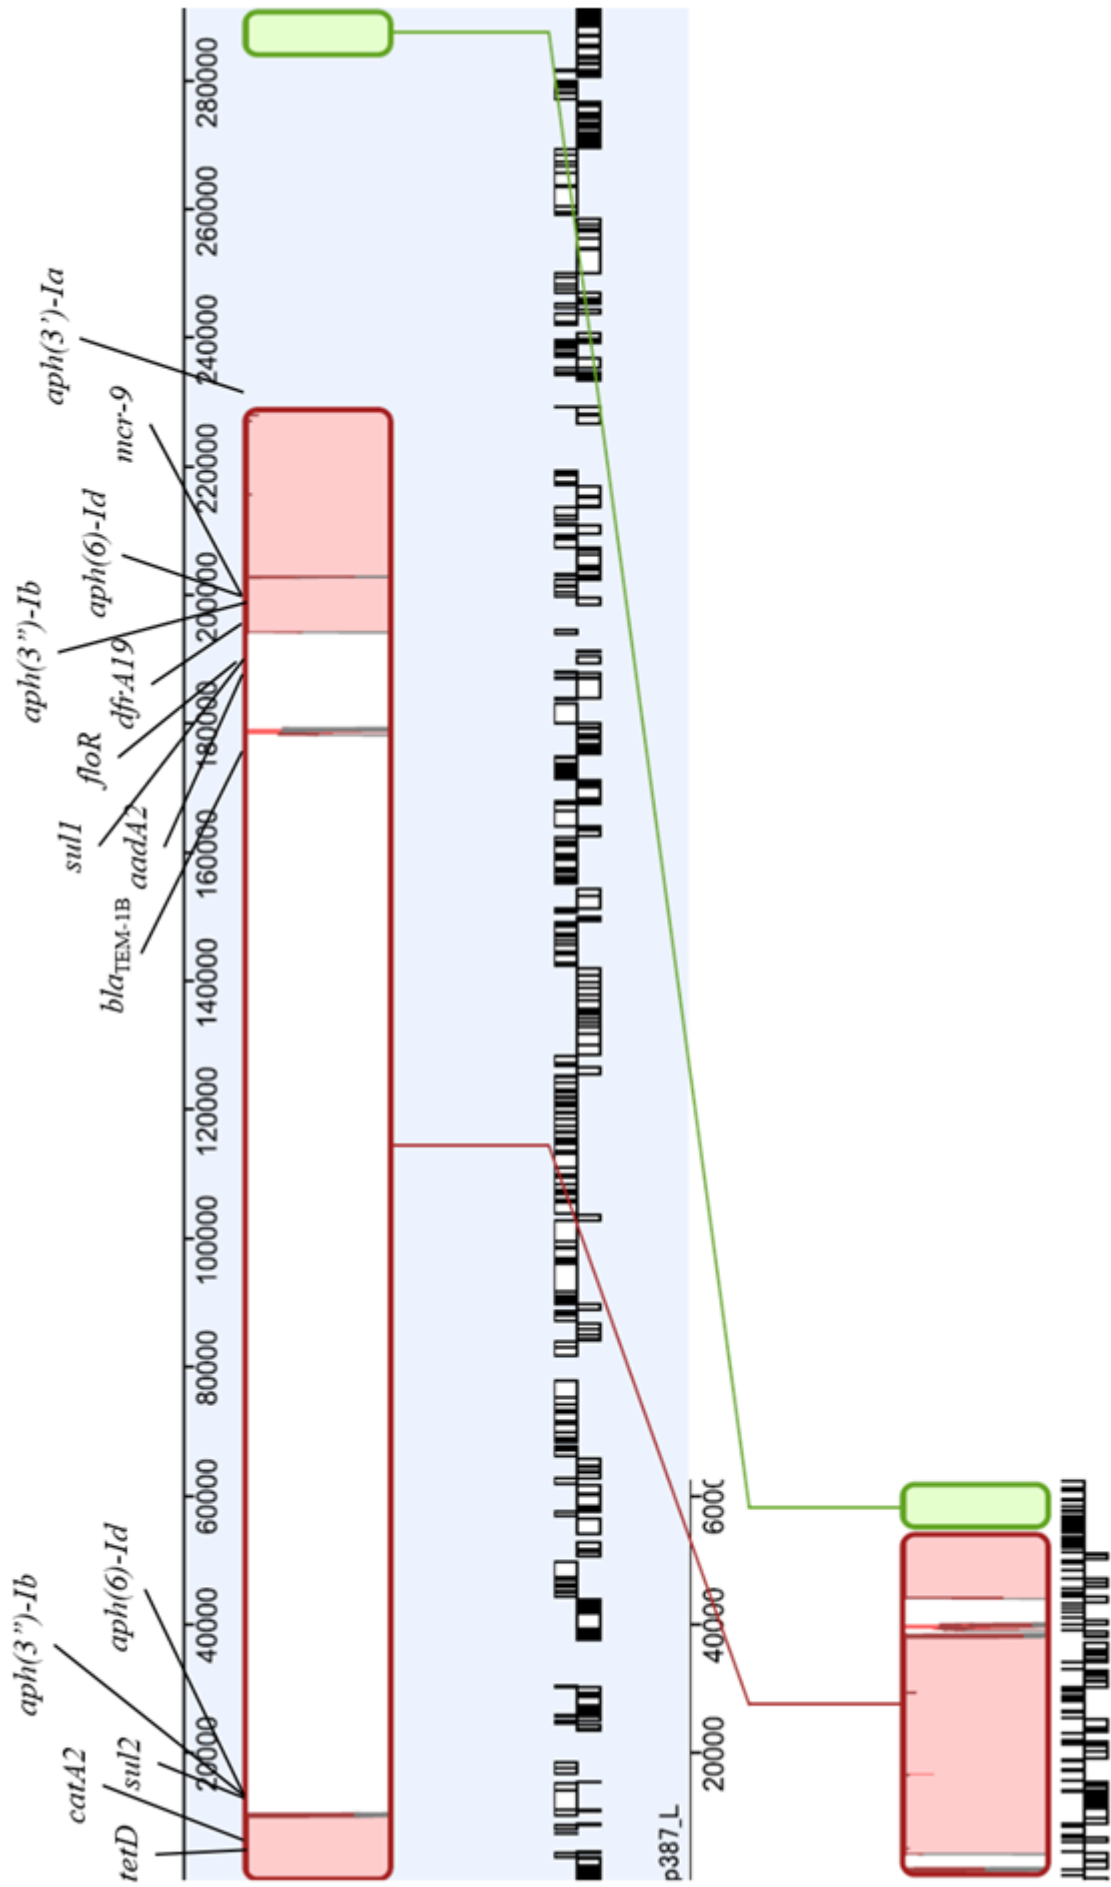

BNSV01000001

**Figure S1**
